# Supplementary material for: Enhancing the photocatalytic hydrogen generation performance and strain regulation of the vertical GeI2/C2N van der Waals heterostructure: insights from first-principles study
Source: Royal Society of Chemistry journal article supplement (doi:10.1039/d1ya00047k), 2022-01-01
Supplement: d1ya00047k1.pdf [file d1ya00047k1.pdf]

### Electronic Supplementary Information

Enhancing the photocatalytic hydrogen generation performance and strain regulation of the vertical GeI<sub>2</sub>/C<sub>2</sub>N van der Waals heterostructure: Insights from first-principles study

Francis Opoku,<sup>\*a</sup> Samuel Osei-Bonsu Oppong,<sup>b</sup> Noah Kyame Asare-Donkor,<sup>a</sup> Osei Akoto,<sup>a</sup>  
Anthony Apeke Adimado<sup>a</sup>

<sup>a</sup>Department of Chemistry, Kwame Nkrumah University of Science and Technology,  
Kumasi, Ghana

<sup>b</sup>Marine Engineering Department, Regional Maritime University, P.O. Box GP 1115, Accra,  
Ghana

\*Corresponding author: ofrancis2010@gmail.com

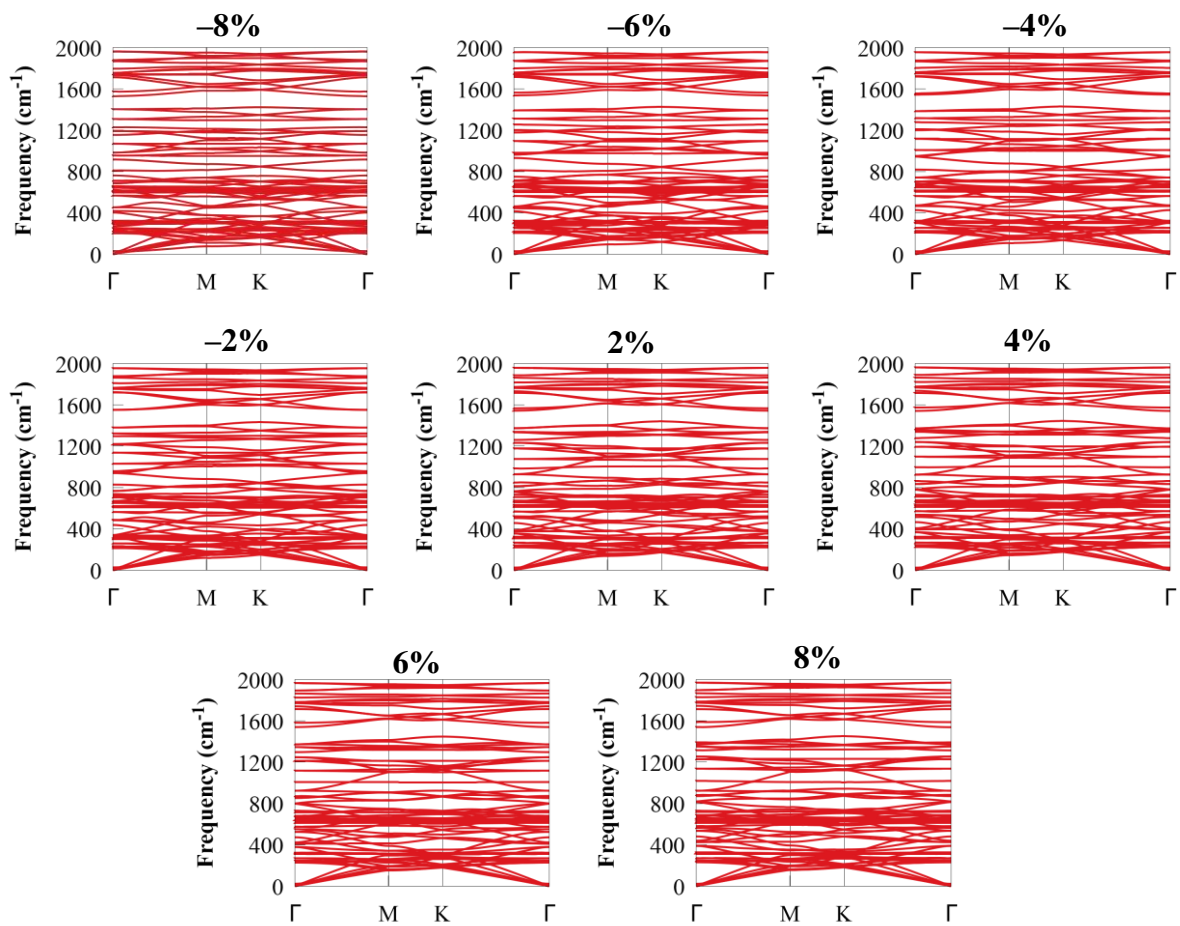

**Figure S1.** phonon dispersion spectra of  $\text{GeI}_2/\text{C}_2\text{N}$  vdW heterostructure under different biaxial.

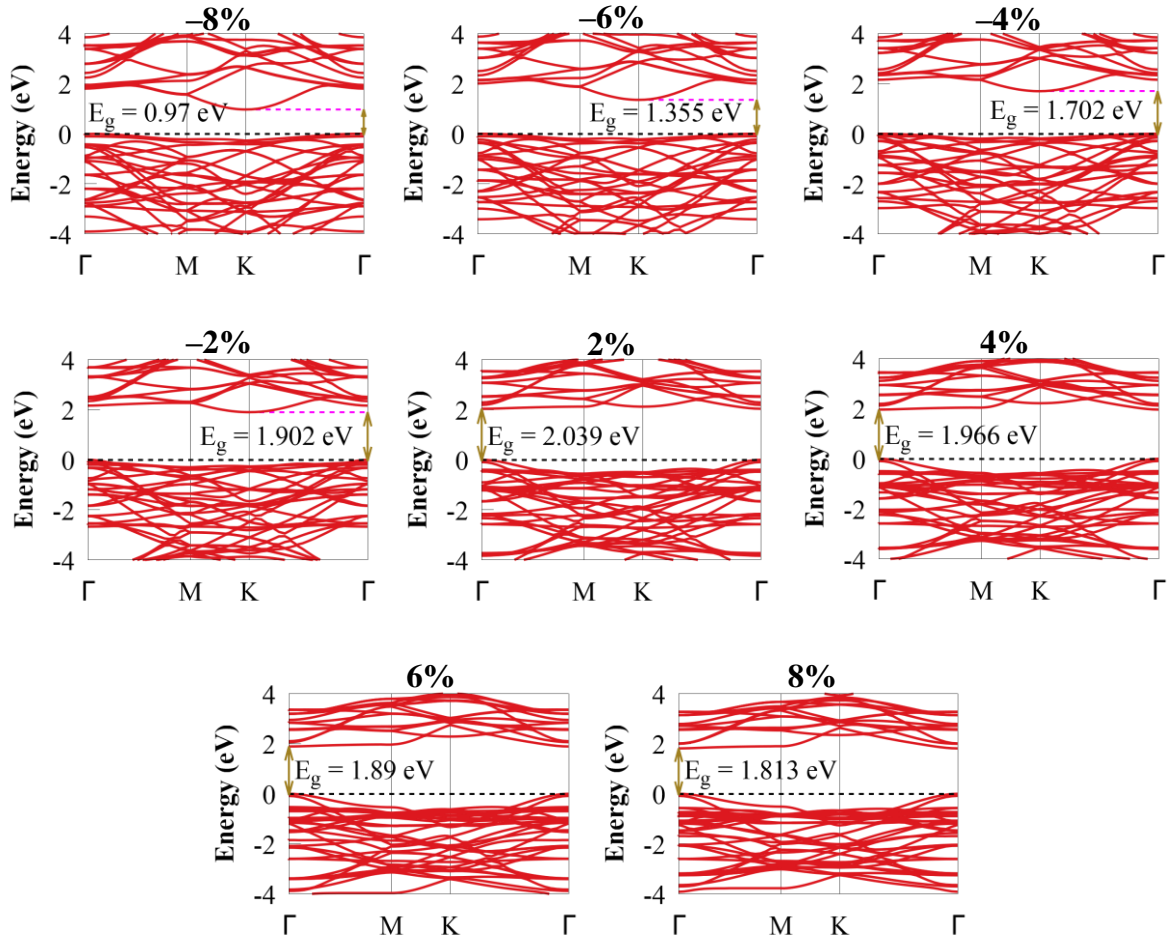

**Figure S2.** Electronic band structures of  $\text{GeI}_2/\text{C}_2\text{N}$  vdW heterostructure under biaxial strain. The Fermi energy is set to zero.

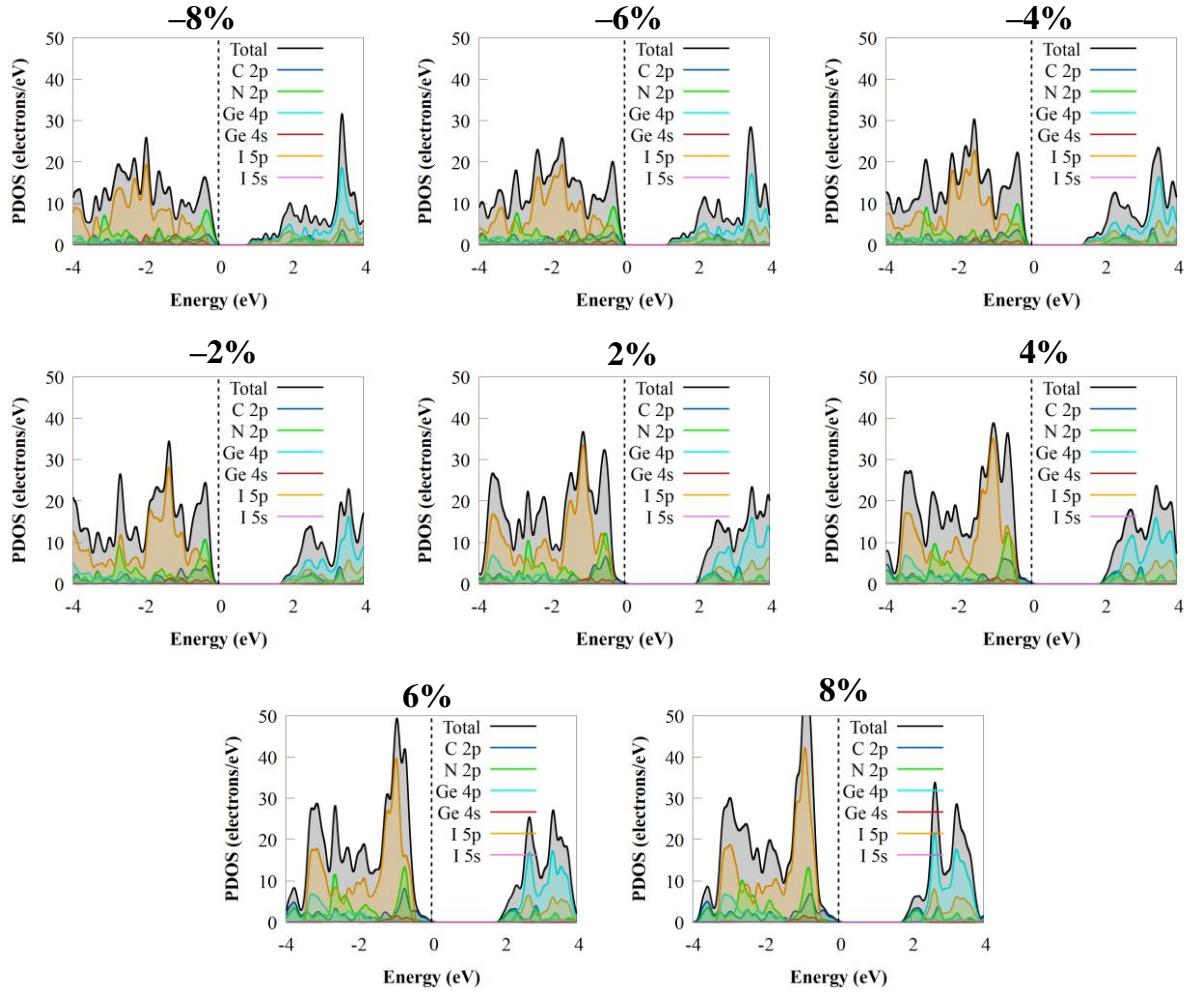

**Figure S3.** PDOS of GeI<sub>2</sub>/C<sub>2</sub>N vdW heterostructure under different biaxial strain.

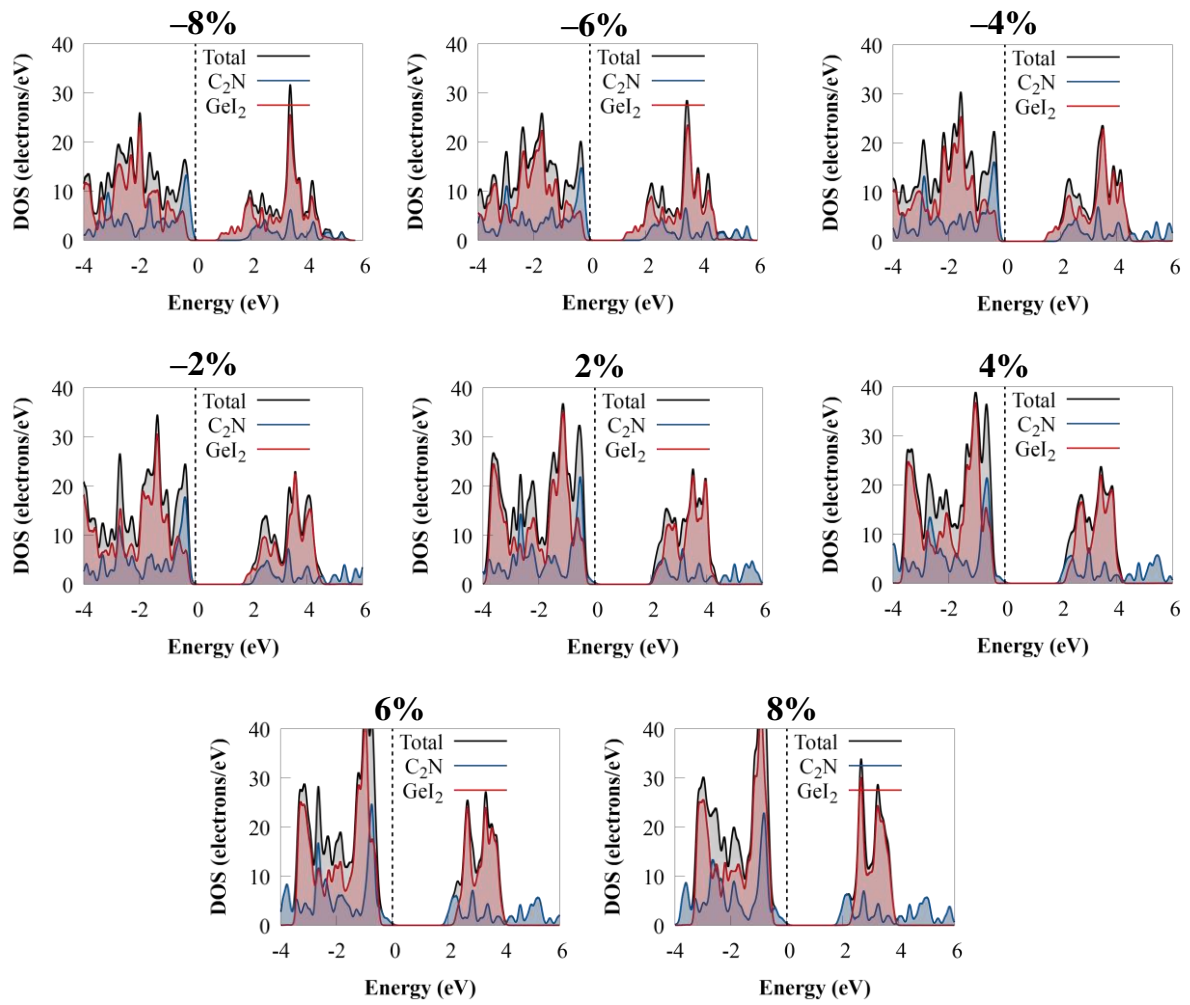

**Figure S3.** The calculated DOS of GeI<sub>2</sub>/C<sub>2</sub>N vdW heterostructure with strains of -8% to 8%. The dashed line denotes the Fermi energy level.

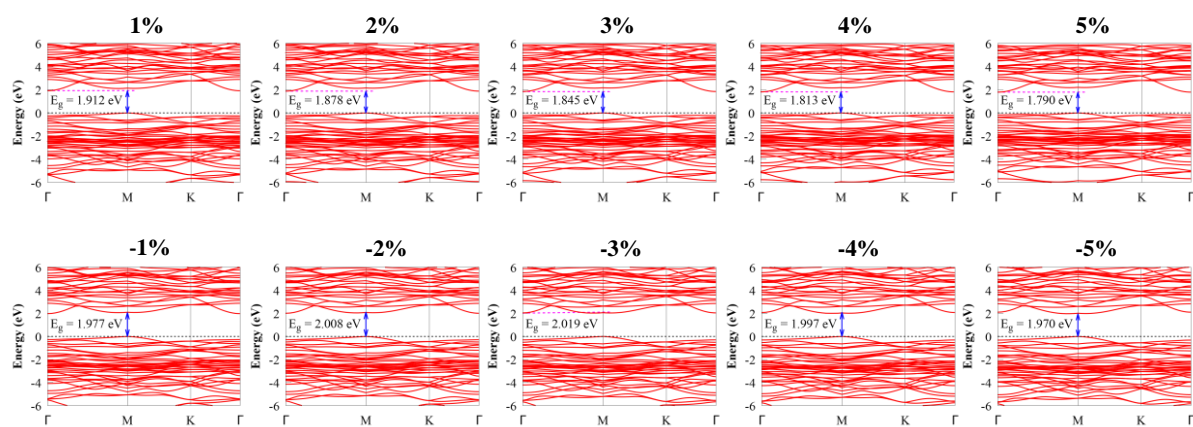

**Figure S4.** The band structure versus strain for HfS<sub>2</sub>/BiOCl heterostructures
